# Supplementary material
Source: PubMed Central journal article supplement (PMC6214747)
Supplement: NIHMS967905-supplement-2.pdf [file NIHMS967905-supplement-2.pdf]

In accordance to Nature Publishing Groups Authorship Policy we agree to change the authors of the manuscript as indicated below.

NAME OF JOURNAL: Oncogene

TITLE OF MANUSCRIPT: Identification of microR-106b as a prognostic biomarker of p53-like bladder cancers by ActMIR

MANUSCRIPT NUMBER : ONC-2017-02467R

CORRESPONDING AUTHORS NAME: Jun Zhu

PREVIOUS AUTHOR NAMES:

Eunjee Lee, Ana Collazo Lorduy, Mireia Castillo-Martin, Li Wang, Matthew D. Galsky, Carlos Cordon-Cardo, and Jun Zhu

UPDATED AUTHOR NAMES:

Eunjee Lee, Ana Collazo Lorduy, Mireia Castillo-Martin, Yixuan Gong, Li Wang, William K. Oh, Matthew D. Galsky, Carlos Cordon-Cardo, and Jun Zhu

CHANGE TO AUTHOR LIST: Add Yixuan Gong and Willam Oh

| Print Name             | Signature                                                                            | Date       |
|------------------------|--------------------------------------------------------------------------------------|------------|
| Eunjee Lee             |   | 04/25/2018 |
| Ana Collazo Lorduy     |   | 04/25/2018 |
| Mireia Castillo-Martin |  | 4-26-2018  |
| Yixuan Gong            |   | 04/25/2018 |
| Li Wang                |   | 04/25/2018 |
| William K. Oh          |                                                                                      |            |
| Matthew D. Galsky      |                                                                                      |            |
| Carlos Cordon-Cardo    |                                                                                      |            |
| Jun Zhu                |   | 4/25/2018  |
