# Supplementary material
Source: PubMed Central journal article supplement (PMC6214747)
Supplement: NIHMS967905-supplement-5.pdf [file NIHMS967905-supplement-5.pdf]

In accordance to Nature Publishing Groups Authorship Policy we agree to change the authors of the manuscript as indicated below.

**NAME OF JOURNAL:** Oncogene

**TITLE OF MANUSCRIPT:** Identification of microR-106b as a prognostic biomarker of p53-like bladder cancers by ActMIR

**MANUSCRIPT NUMBER:** ONC-2017-02467R

**CORRESPONDING AUTHORS NAME:** Jun Zhu

**PREVIOUS AUTHOR NAMES:**

Eunjee Lee, Ana Collazo Lorduy, Mireia Castillo-Martin, Li Wang, Matthew D. Galsky, Carlos Cordon-Cardo, and Jun Zhu

**UPDATED AUTHOR NAMES:**

Eunjee Lee, Ana Collazo Lorduy, Mireia Castillo-Martin, Yixuan Gong, Li Wang, William K. Oh, Matthew D. Galsky, Carlos Cordon-Cardo, and Jun Zhu

**CHANGE TO AUTHOR LIST:** Add Yixuan Gong and William Oh

| Print Name             | Signature                                                                            | Date       |
|------------------------|--------------------------------------------------------------------------------------|------------|
| Eunjee Lee             |   | 04/25/2018 |
| Ana Collazo Lorduy     |                                                                                      |            |
| Mireia Castillo-Martin |                                                                                      |            |
| Yixuan Gong            |                                                                                      |            |
| Li Wang                |                                                                                      |            |
| William K. Oh          |                                                                                      |            |
| Matthew D. Galsky      |                                                                                      |            |
| Carlos Cordon-Cardo    |  | 04/26/18   |
| Jun Zhu                |   | 4/25/2018  |
